# Supplementary material for: Methodological and Ecological Caveats in Deciphering Plant Volatile Emissions: the Case Study of Tomato Exposed to Herbivory and Resource Limitation
Source: Research Square preprint supplement (doi:10.21203/rs.3.rs-419451/v1), 2021-04-15
Supplement: Supplementary file 1 [file f23f77ae40d689e3736cd635.docx]

Supplementary material

**Methodological and ecological caveats in deciphering plant volatile emissions: the case study of tomato exposed to herbivory and resource limitation**

**Table S1** A decade of research in plant-insect interaction and the production of volatile organic compounds by tomato

| **Porous_polymer** | **Number_VOCs** | **Reference** | **DOI** |
| --- | --- | --- | --- |
| Porapak_Q | 13 | Sun et al 2020 | https://doi.org/10.1111/1365-2435.13716 |
| Porapak_Q | 21 | Sun et al 2020 | https://doi.org/10.1111/1365-2435.13716 |
| SPME_(DVB/PDMS) | 22 | Abdollahipour et al 2020 | https://doi.org/10.1016/j.aspen.2020.10.006 |
| SPME_(DVB/PDMS) | 22 | Abdollahipour et al 2020 | <https://doi.org/10.1016/j.aspen.2020.10.006> |
| SPME_(DVB/PDMS) | 22 | Abdollahipour et al 2020 | <https://doi.org/10.1016/j.aspen.2020.10.006> |
| SPME_(DVB/PDMS) | 22 | Abdollahipour et al 2020 | <https://doi.org/10.1016/j.aspen.2020.10.006> |
| Porapak_Q | 18 | Matu et al 2021 | <https://doi.org/10.1007/s00049-020-00327-z> |
| Porapak_Q | not_referenced | Conboy et al 2020 | <https://doi.org/10.1007/s10886-020-01229-8> |
| Porapak_Q | 12,00 | Chen et al 2020 | <https://doi.org/10.1002/ps.6071> |
| Porapak_Q | 12,00 | Chen et al 2020 | <https://doi.org/10.1002/ps.6071> |
| Porapak_Q | 12,00 | Chen et al 2020 | <https://doi.org/10.1002/ps.6071> |
| Porapak_Q | 10,00 | Chen et al 2020 | <https://doi.org/10.1002/ps.6071> |
| Porapak_Q | 10,00 | Chen et al 2020 | <https://doi.org/10.1002/ps.6071> |
| Porapak_Q | 10,00 | Chen et al 2020 | <https://doi.org/10.1002/ps.6071> |
| Porapak_Q | 11,00 | Chen et al 2020 | <https://doi.org/10.1002/ps.6071> |
| Porapak_Q | 11,00 | Chen et al 2020 | <https://doi.org/10.1002/ps.6071> |
| Porapak_Q | 11,00 | Chen et al 2020 | <https://doi.org/10.1002/ps.6071> |
| Porapak_Q | 11,00 | Chen et al 2020 | <https://doi.org/10.1002/ps.6071> |
| Porapak_Q | 11,00 | Chen et al 2020 | <https://doi.org/10.1002/ps.6071> |
| Porapak_Q | 11,00 | Chen et al 2020 | <https://doi.org/10.1002/ps.6071> |
| Super_Q | 17,00 | Missi et al 2020 | <https://doi.org/10.1007/s12600-020-00848-x> |
| Porapak_Q | 13,00 | Yang et al 2020 | https://doi.org/10.1007/s10340-020-01234-6 |
| Porapak_Q | 13,00 | Yang et al 2020 | https://doi.org/10.1007/s10340-020-01234-6 |
| Porapak_Q | 13,00 | Yang et al 2020 | https://doi.org/10.1007/s10340-020-01234-6 |
| Porapak_Q | 13,00 | Yang et al 2020 | https://doi.org/10.1007/s10340-020-01234-6 |
| Porapak_Q | 10,00 | Zhang et al 2020 | <https://doi.org/10.1002/ps.5720> |
| Porapak_Q | 10,00 | Zhang et al 2020 | <https://doi.org/10.1002/ps.5720> |
| Porapak_Q | 11,00 | Zhang et al 2020 | <https://doi.org/10.1002/ps.5720> |
| Porapak_Q | 10,00 | Zhang et al 2020 | <https://doi.org/10.1002/ps.5720> |
| Porapak_Q | 10,00 | Zhang et al 2020 | <https://doi.org/10.1002/ps.5720> |
| Porapak_Q | 10,00 | Zhang et al 2020 | <https://doi.org/10.1002/ps.5720> |
| Tenax | 7,00 | Shi et al 2019 | <https://doi.org/10.1186/s12870-019-2178-z> |
| Tenax | 7,00 | Shi et al 2019 | <https://doi.org/10.1186/s12870-019-2178-z> |
| Tenax | 8,00 | Shi et al 2019 | <https://doi.org/10.1186/s12870-019-2178-z> |
| Porapak_Q | 59,00 | Milonas et al 2019 | <https://doi.org/10.3390/insects10120437> |
| Porapak_Q | 51,00 | Milonas et al 2019 | <https://doi.org/10.3390/insects10120437> |
| Porapak_Q | 50,00 | Milonas et al 2019 | <https://doi.org/10.3390/insects10120437> |
| Porapak_Q | 68,00 | Milonas et al 2019 | <https://doi.org/10.3390/insects10120437> |
| SPME_(PDMS/DVB) | 11,00 | Meneses-Arias et al 2019 | <https://doi.org/10.1111/eea.12857> |
| SPME_(PDMS/DVB) | 11,00 | Meneses-Arias et al 2019 | <https://doi.org/10.1111/eea.12857> |
| SPME_(PDMS/DVB) | 11,00 | Meneses-Arias et al 2019 | <https://doi.org/10.1111/eea.12857> |
| SPME_(DVB/CAR/PDMS) | 14,00 | Mayo-Hernández et al 2019 | <https://doi.org/10.3390/plants8110509> |
| SPME_(DVB/CAR/PDMS) | 11,00 | Mayo-Hernández et al 2019 | <https://doi.org/10.3390/plants8110509> |
| SPME_(DVB/CAR/PDMS) | 17,00 | Mayo-Hernández et al 2019 | <https://doi.org/10.3390/plants8110509> |
| SPME_(DVB/CAR/PDMS) | 10,00 | Mayo-Hernández et al 2019 | <https://doi.org/10.3390/plants8110509> |
| SPME_(DVB/CAR/PDMS) | 4,00 | Mayo-Hernández et al 2019 | <https://doi.org/10.3390/plants8110509> |
| SPME_(DVB/CAR/PDMS) | 3,00 | Mayo-Hernández et al 2019 | <https://doi.org/10.3390/plants8110509> |
| Tenax | 15,00 | Gontijo et al 2019 | https://doi.org/10.1007/s10340-019-01091-y |
| Tenax | 15,00 | Gontijo et al 2019 | https://doi.org/10.1007/s10340-019-01091-y |
| Tenax | 15,00 | Gontijo et al 2019 | https://doi.org/10.1007/s10340-019-01091-y |
| Super_Q | 37,00 | Paudel et al 2019 | <https://doi.org/10.1007/s10886-019-01090-4> |
| Super_Q | 25,00 | Paudel et al 2019 | <https://doi.org/10.1007/s10886-019-01090-4> |
| Super_Q | 7,00 | Paudel et al 2019 | <https://doi.org/10.1007/s10886-019-01090-4> |
| Tenax_plus_Carboxen | 14,00 | Coppola et al 2019 | <https://doi.org/10.3389/fphys.2019.00813> |
| Porapak_Q | 12,00 | Zhang et al 2019 | <https://doi.org/10.1073/pnas.1818599116> |
| Porapak_Q | 10,00 | Zhang et al 2019 | <https://doi.org/10.1073/pnas.1818599116> |
| Porapak_Q | 11,00 | Zhang et al 2019 | <https://doi.org/10.1073/pnas.1818599116> |
| Porapak_Q | 12,00 | Zhang et al 2019 | <https://doi.org/10.1073/pnas.1818599116> |
| Porapak_Q | 12,00 | Zhang et al 2019 | <https://doi.org/10.1073/pnas.1818599116> |
| Porapak_Q | 9,00 | Zhang et al 2019 | <https://doi.org/10.1073/pnas.1818599116> |
| Porapak_Q | 9,00 | Zhang et al 2019 | <https://doi.org/10.1073/pnas.1818599116> |
| Porapak_Q | 10,00 | Zhang et al 2019 | <https://doi.org/10.1073/pnas.1818599116> |
| Porapak_Q | 10,00 | Zhang et al 2019 | <https://doi.org/10.1073/pnas.1818599116> |
| Porapak_Q | 11,00 | Zhang et al 2019 | <https://doi.org/10.1073/pnas.1818599116> |
| Porapak_Q | 10,00 | Zhang et al 2019 | <https://doi.org/10.1073/pnas.1818599116> |
| Porapak_Q | 10,00 | Zhang et al 2019 | <https://doi.org/10.1073/pnas.1818599116> |
| Tenax | not_referenced | Pappas et al 2018 | <https://doi.org/10.3389/fpls.2018.01603> |
| Tenax_plus_Carboxen | 8,00 | Catola et al 2018 | <https://doi.org/10.1016/j.envexpbot.2018.05.001> |
| Tenax_plus_Carboxen | 8,00 | Catola et al 2018 | <https://doi.org/10.1016/j.envexpbot.2018.05.001> |
| Tenax_plus_Carboxen | 8,00 | Catola et al 2018 | <https://doi.org/10.1016/j.envexpbot.2018.05.001> |
| Tenax_plus_Carboxen | 8,00 | Catola et al 2018 | <https://doi.org/10.1016/j.envexpbot.2018.05.001> |
| Tenax_plus_Carboxen | 8,00 | Catola et al 2018 | <https://doi.org/10.1016/j.envexpbot.2018.05.001> |
| Tenax_plus_Carboxen | 8,00 | Catola et al 2018 | <https://doi.org/10.1016/j.envexpbot.2018.05.001> |
| Tenax_plus_Carboxen | 8,00 | Catola et al 2018 | <https://doi.org/10.1016/j.envexpbot.2018.05.001> |
| Tenax_plus_Carboxen | 8,00 | Catola et al 2018 | <https://doi.org/10.1016/j.envexpbot.2018.05.001> |
| Tenax_plus_Carboxen | 30,00 | Coppola et al 2018 | <https://doi.org/10.3390/ijms19092748> |
| Super_Q | 34,00 | Njuguna et al 2018 | <https://doi.org/10.1021/acs.jafc.8b03452> |
| Tenax | 9,00 | Shi et al 2018 | <https://doi.org/10.3389/fmicb.2018.01404> |
| Tenax | 9,00 | Shi et al 2018 | <https://doi.org/10.3389/fmicb.2018.01404> |
| Tenax | 9,00 | Shi et al 2018 | <https://doi.org/10.3389/fmicb.2018.01404> |
| Tenax | 10,00 | Shi et al 2018 | <https://doi.org/10.3389/fmicb.2018.01404> |
| Tenax | 11,00 | Shi et al 2018 | <https://doi.org/10.3389/fmicb.2018.01404> |
| SPME_(PDMS/DVB) | not_referenced | Pérez-Hedo et al 2018 | <https://doi.org/10.1007/s10526-017-9854-4> |
| Porapak_Q | 55,00 | Anastasaki et al 2018 | https://doi.org/10.1007/s10886-018-0929-1 |
| Porapak_Q | 36,00 | Anastasaki et al 2018 | https://doi.org/10.1007/s10886-018-0929-1 |
| SPME | 12,00 | Hamza et al 2018 | <https://doi.org/10.1186/s12870-018-1240-6> |
| HayeSep | 12,00 | Silva et al 2017 | https://doi.org/10.1007/s10886-017-0909-x |
| HayeSep | 13,00 | Silva et al 2017 | https://doi.org/10.1007/s10886-017-0909-x |
| HayeSep | 15,00 | Silva et al 2017 | https://doi.org/10.1007/s10886-017-0909-x |
| HayeSep | 14,00 | Silva et al 2017 | https://doi.org/10.1007/s10886-017-0909-x |
| HayeSep | 15,00 | Silva et al 2017 | https://doi.org/10.1007/s10886-017-0909-x |
| Tenax | 9,00 | Shi et al 2017 | <https://doi.org/10.1111/eea.12635> |
| Tenax | 11,00 | Shi et al 2017 | <https://doi.org/10.1111/eea.12635> |
| Tenax | not_referenced | Coppola et al 2017 | <https://doi.org/10.1111/1744-7917.12475> |
| Tenax | 27,00 | Coppola et al 2017 | <https://doi.org/10.1038/s41598-017-15481-8> |
| Tenax | 26,00 | Coppola et al 2017 | <https://doi.org/10.1038/s41598-017-15481-8> |
| Tenax | 26,00 | Coppola et al 2017 | <https://doi.org/10.1038/s41598-017-15481-8> |
| Tenax | 27,00 | Coppola et al 2017 | <https://doi.org/10.1038/s41598-017-15481-8> |
| Porapak_Q | 32,00 | Liu et al 2017 | <https://doi.org/10.3389/fphys.2017.00937> |
| Porapak_Q | 32,00 | Liu et al 2017 | <https://doi.org/10.3389/fphys.2017.00937> |
| Charcoal | not_referenced | Kersch-Becker et al 2017 | <https://doi.org/10.1098/rspb.2017.1120> |
| Super_Q | 9,00 | Disi et al 2017 | <https://doi.org/10.1007/s11829-017-9503-y> |
| Super_Q | 8,00 | Disi et al 2017 | <https://doi.org/10.1007/s11829-017-9503-y> |
| Super_Q | 9,00 | Disi et al 2017 | <https://doi.org/10.1007/s11829-017-9503-y> |
| Super_Q | 9,00 | Disi et al 2017 | <https://doi.org/10.1007/s11829-017-9503-y> |
| Super_Q | 17,00 | Disi et al 2017 | <https://doi.org/10.1007/s11829-017-9503-y> |
| Super_Q | 18,00 | Disi et al 2017 | <https://doi.org/10.1007/s11829-017-9503-y> |
| SPME_(PDMS/DVB) | 20,00 | Darshanee_Hewa et al 2017 | <https://doi.org/10.3389/fpls.2017.01285> |
| SPME_(PDMS/DVB) | 25,00 | Darshanee_Hewa et al 2017 | <https://doi.org/10.3389/fpls.2017.01285> |
| SPME_(PDMS/DVB) | 25,00 | Darshanee_Hewa et al 2017 | <https://doi.org/10.3389/fpls.2017.01285> |
| SPME_(DVB/CAR/PDMS) | 26,00 | Naselli et al 2017 | <https://doi.org/10.1007/s11829-016-9481-5> |
| SPME_(DVB/CAR/PDMS) | 25,00 | Naselli et al 2017 | <https://doi.org/10.1007/s11829-016-9481-5> |
| SPME_(DVB/CAR/PDMS) | 26,00 | Naselli et al 2017 | <https://doi.org/10.1007/s11829-016-9481-5> |
| HayeSep_Q_ | not_referenced | Arce et al 2017 | <https://doi.org/10.1007/s10886-016-0810-z> |
| Tenax | 80,00 | Silva et al 2017 | <https://doi.org/10.1007/s10886-016-0807-7> |
| Tenax | 75,00 | Silva et al 2017 | <https://doi.org/10.1007/s10886-016-0807-7> |
| Tenax | 70,00 | Silva et al 2017 | <https://doi.org/10.1007/s10886-016-0807-7> |
| Porapak_Q | not_referenced | Ciu et al 2016 | <https://doi.org/10.1016/j.plantsci.2016.09.019> |
| Tenax | 63,00 | Cortés et al 2016 | <https://doi.org/10.1111/nph.14210> |
| Tenax | 65,00 | Cortés et al 2016 | <https://doi.org/10.1111/nph.14210> |
| Tenax | 9,00 | Shi et al 2016 | <https://doi.org/10.3390/ijms17071048> |
| Tenax | 11,00 | Shi et al 2016 | <https://doi.org/10.3390/ijms17071048> |
| Charcoal | 14,00 | Gebreziher and Nakamuta 2016 | <https://doi.org/10.1007/s11829-016-9456-6> |
| Charcoal | 15,00 | Gebreziher and Nakamuta 2016 | <https://doi.org/10.1007/s11829-016-9456-6> |
| Charcoal | 22,00 | Gebreziher and Nakamuta 2016 | <https://doi.org/10.1007/s11829-016-9456-6> |
| SBSE_(PDMS) | 9,00 | Errard et al 2016 | <https://doi.org/10.3389/fpls.2016.01256> |
| SBSE_(PDMS) | 9,00 | Errard et al 2016 | <https://doi.org/10.3389/fpls.2016.01256> |
| SBSE_(PDMS) | 3,00 | Errard et al 2016 | <https://doi.org/10.3389/fpls.2016.01256> |
| SBSE_(PDMS) | 5,00 | Errard et al 2016 | <https://doi.org/10.3389/fpls.2016.01256> |
| SBSE_(PDMS) | 6,00 | Errard et al 2016 | <https://doi.org/10.3389/fpls.2016.01256> |
| SBSE_(PDMS) | 6,00 | Errard et al 2016 | <https://doi.org/10.3389/fpls.2016.01256> |
| SBSE_(PDMS) | 7,00 | Errard et al 2016 | <https://doi.org/10.3389/fpls.2016.01256> |
| SBSE_(PDMS) | 7,00 | Errard et al 2016 | <https://doi.org/10.3389/fpls.2016.01256> |
| SBSE_(PDMS) | 7,00 | Errard et al 2016 | <https://doi.org/10.3389/fpls.2016.01256> |
| SBSE_(PDMS) | 15,00 | Errard et al 2016 | <https://doi.org/10.3389/fpls.2016.01256> |
| SBSE_(PDMS) | 1,00 | Errard et al 2016 | <https://doi.org/10.3389/fpls.2016.01256> |
| SBSE_(PDMS) | 4,00 | Errard et al 2016 | <https://doi.org/10.3389/fpls.2016.01256> |
| SBSE_(PDMS) | 9,00 | Errard et al 2016 | <https://doi.org/10.3389/fpls.2016.01256> |
| SBSE_(PDMS) | 1,00 | Errard et al 2016 | <https://doi.org/10.3389/fpls.2016.01256> |
| SBSE_(PDMS) | 2,00 | Errard et al 2016 | <https://doi.org/10.3389/fpls.2016.01256> |
| SBSE_(PDMS) | 2,00 | Errard et al 2016 | <https://doi.org/10.3389/fpls.2016.01256> |
| SBSE_(PDMS) | 3,00 | Errard et al 2016 | <https://doi.org/10.3389/fpls.2016.01256> |
| SBSE_(PDMS) | 2,00 | Errard et al 2016 | <https://doi.org/10.3389/fpls.2016.01256> |
| Porapak_Q | not_referenced | Groen et al 2016 | <https://doi.org/10.1371/journal.ppat.1005906.s002> |
| HayeSep | 8,00 | Fereres et al 2016 | <https://doi.org/10.3390/v8080225> |
| HayeSep | 10,00 | Fereres et al 2016 | <https://doi.org/10.3390/v8080225> |
| SBSE_(PDMS) | 12,00 | Errard et al 2015 | <https://doi.org/10.1021/acs.jafc.5b03884> |
| SBSE_(PDMS) | 20,00 | Errard et al 2015 | <https://doi.org/10.1021/acs.jafc.5b03884> |
| SBSE_(PDMS) | 18,00 | Errard et al 2015 | <https://doi.org/10.1021/acs.jafc.5b03884> |
| SBSE_(PDMS) | 20,00 | Errard et al 2015 | <https://doi.org/10.1021/acs.jafc.5b03884> |
| SBSE_(PDMS) | 22,00 | Errard et al 2015 | <https://doi.org/10.1021/acs.jafc.5b03884> |
| SBSE_(PDMS) | 8,00 | Errard et al 2015 | <https://doi.org/10.1021/acs.jafc.5b03884> |
| SBSE_(PDMS) | 12,00 | Errard et al 2015 | <https://doi.org/10.1021/acs.jafc.5b03884> |
| SBSE_(PDMS) | 11,00 | Errard et al 2015 | <https://doi.org/10.1021/acs.jafc.5b03884> |
| SBSE_(PDMS) | 11,00 | Errard et al 2015 | <https://doi.org/10.1021/acs.jafc.5b03884> |
| SBSE_(PDMS) | 18,00 | Errard et al 2015 | <https://doi.org/10.1021/acs.jafc.5b03884> |
| HayeSep_Q_ | 32,00 | De_Backer et al 2015 | <https://doi.org/10.1007/s11829-015-9388-6> |
| HayeSep_Q_ | 32,00 | De_Backer et al 2015 | <https://doi.org/10.1007/s11829-015-9388-6> |
| HayeSep_Q_ | 29,00 | De_Backer et al 2015 | <https://doi.org/10.1007/s11829-015-9388-6> |
| HayeSep_Q_ | 30,00 | De_Backer et al 2015 | <https://doi.org/10.1007/s11829-015-9388-6> |
| HayeSep_Q_ | 27,00 | De_Backer et al 2015 | <https://doi.org/10.1007/s11829-015-9388-6> |
| HayeSep_Q_ | 23,00 | De_Backer et al 2015 | <https://doi.org/10.1007/s11829-015-9388-6> |
| HayeSep_Q_ | 29,00 | De_Backer et al 2015 | <https://doi.org/10.1007/s11829-015-9388-6> |
| HayeSep_Q_ | 29,00 | De_Backer et al 2015 | <https://doi.org/10.1007/s11829-015-9388-6> |
| HayeSep_Q_ | 29,00 | De_Backer et al 2015 | <https://doi.org/10.1007/s11829-015-9388-6> |
| HayeSep_Q_ | 30,00 | De_Backer et al 2015 | <https://doi.org/10.1007/s11829-015-9388-6> |
| HayeSep_Q_ | 30,00 | De_Backer et al 2015 | <https://doi.org/10.1007/s11829-015-9388-6> |
| HayeSep_Q_ | 32,00 | De_Backer et al 2015 | <https://doi.org/10.1007/s11829-015-9388-6> |
| SPME_(DVB/CAR/PDMS) | 17,00 | Anastasaki et al 2015 | <https://doi.org/10.1016/j.phytol.2015.07.007> |
| SPME_(DVB/CAR/PDMS) | 19,00 | Anastasaki et al 2015 | <https://doi.org/10.1016/j.phytol.2015.07.007> |
| SPME_(DVB/CAR/PDMS) | 19,00 | Anastasaki et al 2015 | <https://doi.org/10.1016/j.phytol.2015.07.007> |
| SPME_(DVB/CAR/PDMS) | 20,00 | Anastasaki et al 2015 | <https://doi.org/10.1016/j.phytol.2015.07.007> |
| SPME_(DVB/CAR/PDMS) | 19,00 | Anastasaki et al 2015 | <https://doi.org/10.1016/j.phytol.2015.07.007> |
| Tenax | 14,00 | Cascone et al 2015 | <https://doi.org/10.1016/j.jplph.2014.08.011> |
| Tenax | 14,00 | Cascone et al 2015 | <https://doi.org/10.1016/j.jplph.2014.08.011> |
| Tenax | 28,00 | Mas et al 2014 | <https://doi.org/10.1007/s10886-014-0518-x> |
| HayeSep_Q_ | 28,00 | Strapasson et al 2014 | <https://doi.org/10.1007/s10886-014-0503-4> |
| HayeSep_Q_ | 28,00 | Strapasson et al 2014 | <https://doi.org/10.1007/s10886-014-0503-4> |
| HayeSep_Q_ | 28,00 | Strapasson et al 2014 | <https://doi.org/10.1007/s10886-014-0503-4> |
| HayeSep_Q_ | 28,00 | Strapasson et al 2014 | <https://doi.org/10.1007/s10886-014-0503-4> |
| HayeSep_Q_ | 14,00 | Megido et al 2014 | <https://doi.org/10.1007/s11829-014-9315-2> |
| HayeSep_Q_ | 11,00 | Megido et al 2014 | <https://doi.org/10.1007/s11829-014-9315-2> |
| Super_Q | 6,00 | Zebelo et al 2014 | <https://doi.org/10.1186/1471-2229-14-140> |
| Super_Q | 17,00 | Zebelo et al 2014 | <https://doi.org/10.1186/1471-2229-14-140> |
| Super_Q | 17,00 | Zebelo et al 2014 | <https://doi.org/10.1186/1471-2229-14-140> |
| Super_Q | 17,00 | Zebelo et al 2014 | <https://doi.org/10.1186/1471-2229-14-140> |
| Tenax | not_referenced | Sugimoto et al 2014 | <https://doi.org/10.1073/pnas.1320660111> |
| SPME_(DVB/CAR/PDMS) | 11,00 | Bautista-Lozada et al 2013 | <https://doi.org/10.1371/journal.pone.0077199> |
| SPME_(DVB/CAR/PDMS) | 9,00 | Bautista-Lozada et al 2013 | <https://doi.org/10.1371/journal.pone.0077199> |
| SPME_(DVB/CAR/PDMS) | 8,00 | Bautista-Lozada et al 2013 | <https://doi.org/10.1371/journal.pone.0077199> |
| SPME_(DVB/CAR/PDMS) | 11,00 | Bautista-Lozada et al 2013 | <https://doi.org/10.1371/journal.pone.0077199> |
| SPME_(DVB/CAR/PDMS) | 11,00 | Bautista-Lozada et al 2013 | <https://doi.org/10.1371/journal.pone.0077199> |
| Porapak_Q | not_referenced | Smart et al 2013 | <https://doi.org/10.1007/s10886-013-0345-5> |
| Tenax | 12,00 | Battaglia et al 2013 | <https://doi.org/10.1094/MPMI-02-13-0059-R> |
| Super_Q | 22,00 | Reisenman et al 2013 | <https://doi.org/10.1007/s10886-012-0228-1> |
| Super_Q | 22,00 | Reisenman et al 2013 | <https://doi.org/10.1007/s10886-012-0228-1> |
| Porapak_Q | not_referenced | Wei et al 2012 | <https://doi.org/10.1111/j.1365-3040.2012.02575.x> |
| SPME_(Carboxen/PDMS/Carbowax) | 16,00 | Ángeles_López et al 2012 | <https://doi.org/10.1007/s10886-012-0201-z> |
| SPME_(Carboxen/PDMS/Carbowax) | 32,00 | Ángeles_López et al 2012 | <https://doi.org/10.1007/s10886-012-0201-z> |
| SPME_(Carboxen/PDMS/Carbowax) | 29,00 | Ángeles_López et al 2012 | <https://doi.org/10.1007/s10886-012-0201-z> |
| SPME_(Carboxen/PDMS/Carbowax) | 28,00 | Ángeles_López et al 2012 | <https://doi.org/10.1007/s10886-012-0201-z> |
| SPME_(Carboxen/PDMS/Carbowax) | 26,00 | Ángeles_López et al 2012 | <https://doi.org/10.1007/s10886-012-0201-z> |
| SPME_(Carboxen/PDMS/Carbowax) | 25,00 | Ángeles_López et al 2012 | <https://doi.org/10.1007/s10886-012-0201-z> |
| Tenax | 8,00 | Zebelo et al 2012 | http://dx.doi.org/10.1016/j.plantsci.2012.08.006 |
| Tenax | 15,00 | Zebelo et al 2012 | http://dx.doi.org/10.1016/j.plantsci.2012.08.006 |
| Tenax | 16,00 | Zebelo et al 2012 | http://dx.doi.org/10.1016/j.plantsci.2012.08.006 |
| Porapak_Q | not_referenced | Miresmailli et al 2011 | https://doi.org/10.1002/ps.2229 |
| Super_Q | 44 | Proffit et al 2011 | <https://doi.org/10.1007/s10886-011-9961-0> |
| Super_Q | 39 | Proffit et al 2011 | <https://doi.org/10.1007/s10886-011-9961-0> |
| Super_Q | 43 | Proffit et al 2011 | <https://doi.org/10.1007/s10886-011-9961-0> |
| Porapak_Q | 9 | Sun et al 2011 | https://doi.org/10.1371/journal.pone.0019751_ |
| Porapak_Q | 9 | Sun et al 2011 | https://doi.org/10.1371/journal.pone.0019751_ |
| Super_Q | not_referenced | Sarmento et al 2011 | <https://doi.org/10.1111/j.1461-0248.2010.01575.x> |
| Porapak_Q | 7 | Wei et al 2011 | <https://doi.org/10.1111/j.1469-8137.2010.03491.x> |
| Porapak_Q | 11 | Wei et al 2011 | <https://doi.org/10.1111/j.1469-8137.2010.03491.x> |
| Super_Q | 16 | Degenhardt et al 2010 | <https://doi.org/10.1016/j.phytochem.2010.09.010> |
| Super_Q | 16 | Degenhardt et al 2010 | <https://doi.org/10.1016/j.phytochem.2010.09.010> |
| Super_Q | 16 | Degenhardt et al 2010 | <https://doi.org/10.1016/j.phytochem.2010.09.010> |
| SPME_(PDMS/DVB) | not_referenced | Kang et al 2010 | https://doi.org/10.1104/pp.110.160192_ |
| Porapak_Q | not_referenced | Miresmailli et al 2010 | <https://doi.org/10.1002/ps.1967> |
| SPME_DHT | not_available | Shu et al 2010 | doi_not_available_(Allelopathy_Journal) |
| Porapak_Q | 8,00 | Sun et al 2010 | https://doi.org/10.1111/j.1365-3040.2009.02098.x |
| Porapak_Q | 8,00 | Sun et al 2010 | https://doi.org/10.1111/j.1365-3040.2009.02098.x |
| Tenax | 14,00 | Digilio et al 2010 | https://doi.org/10.1111/j.1469-8137.2010.03314.x |
| Tenax | 14,00 | Digilio et al 2010 | https://doi.org/10.1111/j.1469-8137.2010.03314.x |
| Tenax | 14,00 | Digilio et al 2010 | https://doi.org/10.1111/j.1469-8137.2010.03314.x |

**Table S2** Correlations between volatile organic compounds captured with Porapak Q filters and principal components used to perform the discriminant analysis shown in Figure 1a.

| **Volatile organic compound** | **PC1** | **PC2** | **PC3** | **PC4** | **PC5** | **PC6** |
| --- | --- | --- | --- | --- | --- | --- |
| propanoic acid ester #1 | -0.73 | -0.54 | 0.16 | -0.02 | 0.32 | 0.08 |
| propanoic acid ester #2 | 0.08 | 0.28 | -0.31 | 0.48 | 0.31 | -0.65 |
| pentanoic acid ester | -0.89 | -0.15 | 0.13 | 0.25 | -0.21 | 0.04 |
| decanal | -0.65 | -0.45 | 0.14 | 0.15 | -0.31 | -0.1 |
| nonanal | -0.77 | -0.45 | 0.14 | 0.15 | 0.16 | -0.14 |
| decane | -0.34 | -0.41 | -0.79 | -0.05 | -0.12 | 0.08 |
| alkane #1 | -0.37 | -0.35 | -0.82 | -0.04 | -0.12 | 0.01 |
| heneicosane | -0.68 | -0.54 | -0.42 | -0.08 | 0.07 | 0.09 |
| cyclohexanone | -0.89 | -0.26 | 0.09 | 0.02 | 0.19 | 0.02 |
| cyclopentanone | -0.74 | -0.54 | 0.22 | -0.07 | 0.27 | 0.09 |
| ascaridole | -0.75 | 0.1 | -0.44 | -0.1 | -0.07 | -0.16 |
| 2-carene | -0.73 | 0.65 | -0.01 | -0.1 | 0 | 0.04 |
| m-cymene | -0.76 | 0.56 | 0 | -0.15 | 0.1 | 0.02 |
| p-cymene | -0.65 | 0.6 | -0.08 | 0.09 | -0.07 | -0.18 |
| 1,3,8-p-menthatriene | -0.86 | 0.43 | -0.02 | -0.11 | 0.13 | 0.01 |
| (*Z*)-β-ocimene | -0.92 | 0.04 | 0.15 | 0.07 | 0.11 | -0.13 |
| β-phellandrene | -0.76 | 0.61 | -0.01 | -0.11 | 0.04 | 0.05 |
| α-pinene | -0.74 | 0.64 | 0 | -0.09 | 0.04 | 0.06 |
| β-pinene | -0.93 | 0.23 | 0.04 | 0.04 | 0.12 | -0.04 |
| α-terpinene | -0.75 | 0.61 | 0.01 | -0.1 | 0.03 | 0.09 |
| terpinolene | -0.8 | 0.51 | 0.04 | -0.06 | 0.1 | 0.1 |
| aristolene | -0.89 | -0.02 | 0.06 | 0.31 | -0.24 | 0.02 |
| (*E*)-β-caryophyllene | -0.88 | -0.03 | 0.15 | 0.18 | -0.27 | 0.08 |
| α-copaene | -0.83 | 0 | -0.31 | -0.11 | 0 | -0.17 |
| β-elemene | -0.86 | -0.16 | -0.21 | -0.14 | -0.08 | 0.1 |
| δ-elemene | -0.85 | -0.1 | 0.12 | 0.32 | -0.27 | 0.03 |
| α-humulene | -0.88 | -0.03 | 0.17 | 0.21 | -0.29 | 0.07 |
| methyl salicylate | -0.36 | -0.26 | 0.25 | -0.63 | -0.25 | -0.47 |
| undecene | -0.77 | -0.51 | 0.1 | -0.08 | 0.24 | 0.05 |
| unknown #1 | -0.62 | -0.41 | 0.3 | -0.45 | -0.17 | -0.22 |
| unknown #2 | -0.72 | -0.59 | -0.09 | -0.06 | 0.22 | 0.12 |
| unknown #3 | -0.76 | -0.37 | 0.2 | 0.23 | 0.12 | -0.1 |
| unknown #4 | -0.79 | 0.54 | -0.1 | -0.07 | 0.02 | 0.11 |

**Table S3** Correlations between volatile organic compounds captured with polydimethylsiloxane and principal components used to perform the discriminant analysis shown in Figure 1b.

| **Volatile organic compound** | **PC1** | **PC2** | **PC3** | **PC4** | **PC5** | **PC6** |
| --- | --- | --- | --- | --- | --- | --- |
| decanoic acid ester | -0.06 | 0.65 | -0.04 | -0.12 | -0.24 | -0.35 |
| nonanoic acid ester | 0.16 | 0.68 | 0.06 | -0.05 | -0.45 | -0.07 |
| octanoic acid ester | -0.38 | -0.3 | -0.27 | -0.28 | 0.15 | -0.43 |
| decanal | -0.03 | 0.67 | -0.4 | -0.27 | -0.29 | 0.1 |
| nonanal | 0.03 | 0.68 | -0.39 | -0.15 | 0.16 | 0.26 |
| n-decane | -0.52 | -0.01 | -0.38 | 0.14 | 0.04 | -0.24 |
| tetramethylhexane | 0.24 | -0.16 | -0.39 | 0.81 | -0.12 | -0.05 |
| p-cymene | 0.36 | -0.08 | -0.45 | 0.63 | -0.1 | -0.02 |
| ectocarpene | -0.51 | -0.28 | -0.22 | 0.02 | -0.17 | -0.13 |
| alloocimene | 0.15 | 0.07 | 0.25 | -0.15 | -0.16 | -0.49 |
| α-ocimene | -0.64 | -0.23 | 0.16 | 0.41 | -0.21 | 0.19 |
| α-phellandrene | -0.22 | -0.28 | -0.45 | -0.28 | 0.34 | 0.07 |
| β-phellandrene | 0.76 | -0.17 | 0.23 | 0.1 | 0.43 | -0.04 |
| α-pinene | 0.28 | -0.51 | 0.09 | -0.23 | -0.43 | 0.37 |
| α-terpinene | 0.31 | -0.44 | 0.41 | -0.49 | 0.39 | -0.04 |
| terpinolene | 0.18 | 0.06 | 0.75 | -0.29 | -0.22 | -0.15 |
| alloaromadendrene | -0.68 | 0.06 | 0.05 | -0.01 | 0.1 | -0.02 |
| (*E*)-β-caryophyllene | -0.87 | 0.07 | 0.15 | 0.16 | 0.1 | 0.16 |
| α-copaene | -0.77 | 0.05 | 0.33 | 0.03 | -0.02 | 0.08 |
| δ-elemene | -0.67 | -0.05 | 0.33 | 0.1 | -0.17 | -0.34 |
| α-gurjunene | -0.13 | -0.24 | -0.1 | -0.29 | -0.35 | 0.2 |
| α-humulene | -0.57 | 0.22 | -0.02 | -0.11 | 0.34 | 0.31 |
| bergamiol | -0.47 | 0.17 | 0 | 0.04 | 0.26 | -0.17 |
| 4-caranol | 0.12 | 0.41 | 0.48 | -0.06 | 0.01 | 0.3 |
| trans-3-caren-2-ol | 0.03 | -0.42 | -0.4 | -0.5 | -0.36 | 0.33 |
| 3-decyn-2-ol | -0.46 | 0.14 | -0.11 | -0.3 | 0.08 | -0.43 |
| geraniol | -0.47 | 0.22 | 0.46 | 0.05 | 0.07 | 0.44 |
| menthol | 0.13 | 0.59 | 0.1 | -0.03 | -0.55 | -0.14 |
| 2,5-dimethyl-3,4-hexanediol | -0.06 | 0.62 | -0.24 | -0.25 | 0.33 | 0.16 |
| 6,10-dimethyl-5,9-undecadien-2-one | -0.12 | 0.37 | -0.16 | 0.04 | 0.12 | -0.01 |
| 4-methyl-1-decene | -0.47 | -0.23 | 0.36 | 0.32 | -0.26 | 0.18 |
| 4-methylmannitol | -0.39 | -0.42 | -0.54 | -0.37 | -0.32 | 0.11 |
| unknown #1 | 0.1 | 0.6 | -0.15 | 0.14 | 0.14 | 0.26 |
